# Supplementary material
Source: ML conference proceedings conference paper supplement (https://proceedings.neurips.cc/paper_files/paper/2022/hash/2456a42386e445ba884511aa17ca4a30-Abstract.html)
Supplement: Supplementary file 1 [file 2456a42386e445ba884511aa17ca4a30-Supplemental-Conference.zip]

Archive with 203 entries (150 files):
- neurips_2022_appendix_camera.pdf
- README.md
- ResQ/
- ResQ/src/
- ResQ/src/__init__.py
- ResQ/src/components/
- ResQ/src/components/__init__.py
- ResQ/src/components/action_selectors.py
- ResQ/src/components/episode_buffer.py
- ResQ/src/components/epsilon_schedules.py
- ResQ/src/components/transforms.py
- ResQ/src/config/
- ResQ/src/config/algs/
- ResQ/src/config/algs/ResQ.yaml
- ResQ/src/config/default.yaml
- ResQ/src/config/envs/
- ResQ/src/config/envs/particle.yaml
- ResQ/src/config/envs/sc2.yaml
- ResQ/src/config/envs/sc2_beta.yaml
- ResQ/src/controllers/
- ResQ/src/controllers/__init__.py
- ResQ/src/controllers/basic_central_controller.py
- ResQ/src/controllers/basic_controller.py
- ResQ/src/controllers/conv_controller.py
- ResQ/src/controllers/cqmix_controller.py
- ResQ/src/controllers/lica_controller.py
- ResQ/src/controllers/maven_controller.py
- ResQ/src/controllers/n_controller.py
- ResQ/src/controllers/ppo_controller.py
- ResQ/src/envs/
- ResQ/src/envs/__init__.py
- ResQ/src/envs/multiagentenv.py
- ResQ/src/envs/particle/
- ResQ/src/envs/particle/__init__.py
- ResQ/src/envs/particle/environment.py
- ResQ/src/envs/particle/multi_discrete.py
- ResQ/src/envs/particle/particle.py
- ResQ/src/envs/particle/scenarios/
- ResQ/src/envs/particle/scenarios/__init__.py
- ResQ/src/envs/particle/scenarios/simple_tag_coop.py
- ResQ/src/envs/stag_hunt/
- ResQ/src/envs/stag_hunt/__init__.py
- ResQ/src/envs/stag_hunt/__pycache__/
- ResQ/src/envs/stag_hunt/__pycache__/__init__.cpython-38.pyc
- ResQ/src/envs/stag_hunt/__pycache__/stag_hunt.cpython-38.pyc
- ResQ/src/envs/stag_hunt/stag_hunt.py
- ResQ/src/learners/
- ResQ/src/learners/__init__.py
- ResQ/src/learners/q_learner.py
- ResQ/src/learners/qtran_learner.py
- ResQ/src/learners/rest_q_learner_central.py
- ResQ/src/main.py
- ResQ/src/modules/
- ResQ/src/modules/__init__.py
- ResQ/src/modules/agents/
- ResQ/src/modules/agents/__init__.py
- ResQ/src/modules/agents/central_rnn_agent.py
- ResQ/src/modules/agents/conv_agent.py
- ResQ/src/modules/agents/ff_agent.py
- ResQ/src/modules/agents/mlp_agent.py
- ResQ/src/modules/agents/n_rnn_agent.py
- ResQ/src/modules/agents/rnn_agent.py
- ResQ/src/modules/agents/rnn_ppo_agent.py
- ResQ/src/modules/critics/
- ResQ/src/modules/critics/__init__.py
- ResQ/src/modules/critics/centralv.py
- ResQ/src/modules/critics/coma.py
- ResQ/src/modules/critics/fmac_critic.py
- ResQ/src/modules/critics/lica.py
- ResQ/src/modules/critics/offpg.py
- ResQ/src/modules/layer/
- ResQ/src/modules/layer/__init__.py
- ResQ/src/modules/layer/self_atten.py
- ResQ/src/modules/mixers/
- ResQ/src/modules/mixers/__init__.py
- ResQ/src/modules/mixers/dmaq_general.py
- ResQ/src/modules/mixers/dmaq_si_weight.py
- ResQ/src/modules/mixers/maven_qmix.py
- ResQ/src/modules/mixers/nmix.py
- ResQ/src/modules/mixers/qatten.py
- ResQ/src/modules/mixers/qmix.py
- ResQ/src/modules/mixers/qmix_central_no_hyper.py
- ResQ/src/modules/mixers/qtran.py
- ResQ/src/modules/mixers/vdn.py
- ResQ/src/modules/utils/
- ResQ/src/modules/utils/maven_module.py
- ResQ/src/run/
- ResQ/src/run/__init__.py
- ResQ/src/run/dop_run.py
- ResQ/src/run/on_off_run.py
- ResQ/src/run/run.py
- ResQ/src/runners/
- ResQ/src/runners/__init__.py
- ResQ/src/runners/episode_runner.py
- ResQ/src/runners/parallel_runner.py
- ResQ/src/smac/
- ResQ/src/smac/__init__.py
- ResQ/src/smac/bin/
- ResQ/src/smac/bin/__init__.py
- ResQ/src/smac/bin/map_list.py
- ResQ/src/smac/env/
- ResQ/src/smac/env/__init__.py
- ResQ/src/smac/env/multiagentenv.py
- ResQ/src/smac/env/starcraft2/
- ResQ/src/smac/env/starcraft2/__init__.py
- ResQ/src/smac/env/starcraft2/maps/
- ResQ/src/smac/env/starcraft2/maps/__init__.py
- ResQ/src/smac/env/starcraft2/maps/smac_maps.py
- ResQ/src/smac/env/starcraft2/starcraft2.py
- ResQ/src/smac/examples/
- ResQ/src/smac/examples/__init__.py
- ResQ/src/smac/examples/random_agents.py
- ResQ/src/smac/examples/rllib/
- ResQ/src/smac/examples/rllib/__init__.py
- ResQ/src/smac/examples/rllib/env.py
- ResQ/src/smac/examples/rllib/model.py
- ResQ/src/smac/examples/rllib/run_ppo.py
- ResQ/src/smac/examples/rllib/run_qmix.py
- ResQ/src/utils/
- ResQ/src/utils/dict2namedtuple.py
- ResQ/src/utils/logging.py
- ResQ/src/utils/rl_utils.py
- ResQ/src/utils/th_utils.py
- ResQ/src/utils/timehelper.py
- ResZ/
- ResZ/ResZ-src/
- ResZ/ResZ-src/__init__.py
- ResZ/ResZ-src/components/
- ResZ/ResZ-src/components/__init__.py
- ResZ/ResZ-src/components/__pycache__/
- ResZ/ResZ-src/components/action_selectors.py
- ResZ/ResZ-src/components/episode_buffer.py
- ResZ/ResZ-src/components/epsilon_schedules.py
- ResZ/ResZ-src/components/transforms.py
- ResZ/ResZ-src/config/
- ResZ/ResZ-src/config/algs/
- ResZ/ResZ-src/config/algs/coma.yaml
- ResZ/ResZ-src/config/algs/iql.yaml
- ResZ/ResZ-src/config/algs/iql_beta.yaml
- ResZ/ResZ-src/config/algs/qmix.yaml
- ResZ/ResZ-src/config/algs/qmix_beta.yaml
- ResZ/ResZ-src/config/algs/qtran.yaml
- ResZ/ResZ-src/config/algs/ResZ.yaml
- ResZ/ResZ-src/config/algs/vdn.yaml
- ResZ/ResZ-src/config/algs/vdn_beta.yaml
- ResZ/ResZ-src/config/default.yaml
- ResZ/ResZ-src/config/envs/
- ResZ/ResZ-src/config/envs/sc2.yaml
- ResZ/ResZ-src/config/envs/sc2_beta.yaml
- ResZ/ResZ-src/controllers/
- ResZ/ResZ-src/controllers/__init__.py
- ResZ/ResZ-src/controllers/__pycache__/
- ResZ/ResZ-src/controllers/base_controller.py
- ResZ/ResZ-src/controllers/basic_central_controller.py
- ResZ/ResZ-src/controllers/basic_controller.py
- ResZ/ResZ-src/envs/
- ResZ/ResZ-src/envs/__init__.py
- ResZ/ResZ-src/envs/__pycache__/
- ResZ/ResZ-src/envs/multiagentenv.py
- ResZ/ResZ-src/learners/
- ResZ/ResZ-src/learners/__init__.py
- ResZ/ResZ-src/learners/dresq.py
- ResZ/ResZ-src/learners/q_learner.py
- ResZ/ResZ-src/main.py
- ResZ/ResZ-src/modules/
- ResZ/ResZ-src/modules/__init__.py
- ResZ/ResZ-src/modules/__pycache__/
- ResZ/ResZ-src/modules/agents/
- ResZ/ResZ-src/modules/agents/__init__.py
- ResZ/ResZ-src/modules/agents/__pycache__/
- ResZ/ResZ-src/modules/agents/central_rnn_agent.py
- ResZ/ResZ-src/modules/agents/iqn_rnn_agent.py
- ResZ/ResZ-src/modules/agents/rnn_agent.py
- ResZ/ResZ-src/modules/critics/
- ResZ/ResZ-src/modules/critics/__init__.py
- ResZ/ResZ-src/modules/critics/__pycache__/
- ResZ/ResZ-src/modules/critics/coma.py
- ResZ/ResZ-src/modules/mixers/
- ResZ/ResZ-src/modules/mixers/__init__.py
- ResZ/ResZ-src/modules/mixers/__pycache__/
- ResZ/ResZ-src/modules/mixers/datten.py
- ResZ/ResZ-src/modules/mixers/ddn.py
- ResZ/ResZ-src/modules/mixers/dmix.py
- ResZ/ResZ-src/modules/mixers/dresq_central.py
- ResZ/ResZ-src/modules/mixers/dresq_central_atten.py
- ResZ/ResZ-src/modules/mixers/qmix.py
- ResZ/ResZ-src/modules/mixers/qmix_central_no_hyper.py
- ResZ/ResZ-src/modules/mixers/qtran.py
- ResZ/ResZ-src/modules/mixers/vdn.py
- ResZ/ResZ-src/run.py
- ResZ/ResZ-src/runners/
- ResZ/ResZ-src/runners/__init__.py
- ResZ/ResZ-src/runners/__pycache__/
- ResZ/ResZ-src/runners/episode_runner.py
- ResZ/ResZ-src/runners/parallel_runner.py
- ResZ/ResZ-src/utils/
- ResZ/ResZ-src/utils/__init__.py
- ResZ/ResZ-src/utils/__pycache__/
- ResZ/ResZ-src/utils/dict2namedtuple.py
- ResZ/ResZ-src/utils/logging.py
- ResZ/ResZ-src/utils/rl_utils.py
- ResZ/ResZ-src/utils/th_utils.py
- ResZ/ResZ-src/utils/timehelper.py
