# Supplementary material
Source: ML conference proceedings conference paper supplement (https://proceedings.neurips.cc/paper_files/paper/2022/hash/2456a42386e445ba884511aa17ca4a30-Abstract.html)
Supplement: Supplementary file 1 [file 2456a42386e445ba884511aa17ca4a30-Supplemental-Conference.zip › ResQ/src/config/algs/ResQ.yaml]

# use epsilon greedy action selector
action_selector: "epsilon_greedy"
epsilon_start: 1.0
epsilon_finish: 0.05
epsilon_anneal_time: 100000


runner: "episode"
batch_size_run: 1
buffer_size: 5000
batch_size: 32

# update the target network every {} episodes
target_update_interval: 200
t_max: 1050000

# use the Q_Learner to train
agent_output_type: "q"
learner: "restq_learner_central"
double_q: True
mixer: "qmix"
mixing_embed_dim: 32
hypernet_layers: 2
hypernet_embed: 64


hysteretic_qmix: False # False -> CW-QMIX, True -> OW-QMIX  #should be False
central_mixing_embed_dim: 128
central_action_embed: 1
central_mac: "basic_central_mac"
central_agent: "central_rnn"
central_rnn_hidden_dim: 64
central_mixer: "ff"

td_lambda: 0.6
lr: 0.001
resq_version: "v3"

central_loss: 1
noopt_loss: 1
qmix_loss: 1
condition_loss: "mse"
condition_loss_delta: 0.001
max_second_gap: 0
condition: "max_action"
residual_negative_abs: True  #if false, it use MSE Loss to implement the inequality condition
name: "ResQ"
