# Supplementary material
Source: ML conference proceedings conference paper supplement (https://proceedings.neurips.cc/paper_files/paper/2022/hash/2456a42386e445ba884511aa17ca4a30-Abstract.html)
Supplement: Supplementary file 1 [file 2456a42386e445ba884511aa17ca4a30-Supplemental-Conference.zip › ResQ/src/config/envs/particle.yaml]

env: particle

test_greedy: True
test_nepisode: 32
test_interval: 1000
log_interval: 1000
runner_log_interval: 1000
learner_log_interval: 1000
t_max: 50000

obs_last_action: True

env_args:
  map_name: particle
  benchmark: False
  scenario: "simple_tag_coop"
  episode_limit: 25
  state_mode: "all"
  agent_view_radius: 1.5
  score_function: "min"
  partial_obs: True
