# Supplementary material
Source: ML conference proceedings conference paper supplement (https://proceedings.neurips.cc/paper_files/paper/2022/hash/2456a42386e445ba884511aa17ca4a30-Abstract.html)
Supplement: Supplementary file 1 [file 2456a42386e445ba884511aa17ca4a30-Supplemental-Conference.zip › ResQ/src/controllers/__init__.py]

REGISTRY = {}

from .basic_controller import BasicMAC
from .n_controller import NMAC
from .ppo_controller import PPOMAC
from .conv_controller import ConvMAC
from .basic_central_controller import CentralBasicMAC
from .lica_controller import LICAMAC
from .maven_controller import MAVENMAC
from .cqmix_controller import CQMixMAC

REGISTRY["basic_mac"] = BasicMAC
REGISTRY["n_mac"] = NMAC
REGISTRY["ppo_mac"] = PPOMAC
REGISTRY["conv_mac"] = ConvMAC
REGISTRY["basic_central_mac"] = CentralBasicMAC
REGISTRY["lica_mac"] = LICAMAC
REGISTRY["maven_mac"] = MAVENMAC
REGISTRY["cqmix_mac"] = CQMixMAC
