# Supplementary material
Source: ML conference proceedings conference paper supplement (https://proceedings.neurips.cc/paper_files/paper/2022/hash/2456a42386e445ba884511aa17ca4a30-Abstract.html)
Supplement: Supplementary file 1 [file 2456a42386e445ba884511aa17ca4a30-Supplemental-Conference.zip › ResQ/src/controllers/lica_controller.py]

from modules.agents import REGISTRY as agent_REGISTRY
from components.action_selectors import REGISTRY as action_REGISTRY
import torch as th
from .basic_controller import BasicMAC


# This multi-agent controller shares parameters between agents
class LICAMAC(BasicMAC):
    def select_actions(self, ep_batch, t_ep, t_env, bs=slice(None), test_mode=False):
        # Only select actions for the selected batch elements in bs
        avail_actions = ep_batch["avail_actions"][:, t_ep]
        agent_outputs = self.forward(ep_batch, t_ep, test_mode=test_mode, gumbel=(not test_mode))
        return self.action_selector.select_action(agent_outputs[bs], avail_actions[bs], t_env, test_mode=test_mode)

    def forward(self, ep_batch, t, test_mode=False, gumbel=False):
        agent_inputs = self._build_inputs(ep_batch, t)
        avail_actions = ep_batch["avail_actions"][:, t]
        agent_outs, self.hidden_states = self.agent(agent_inputs, self.hidden_states)

        # Softmax the agent outputs if they're policy logits
        if self.agent_output_type == "pi_logits":

            if getattr(self.args, "mask_before_softmax", True):
                # Make the logits for unavailable actions very negative to minimise their affect on the softmax
                agent_outs = agent_outs.reshape(ep_batch.batch_size * self.n_agents, -1)
                reshaped_avail_actions = avail_actions.reshape(ep_batch.batch_size * self.n_agents, -1)
                agent_outs[reshaped_avail_actions == 0] = -1e10

            if gumbel:
                return agent_outs.view(ep_batch.batch_size, self.n_agents, -1)

            agent_outs = th.nn.functional.softmax(agent_outs, dim=-1)

        return agent_outs.view(ep_batch.batch_size, self.n_agents, -1)
