# Supplementary material
Source: ML conference proceedings conference paper supplement (https://proceedings.neurips.cc/paper_files/paper/2022/hash/2456a42386e445ba884511aa17ca4a30-Abstract.html)
Supplement: Supplementary file 1 [file 2456a42386e445ba884511aa17ca4a30-Supplemental-Conference.zip › ResQ/src/controllers/n_controller.py]

from modules.agents import REGISTRY as agent_REGISTRY
from components.action_selectors import REGISTRY as action_REGISTRY
from .basic_controller import BasicMAC
import torch as th
from utils.rl_utils import RunningMeanStd
import numpy as np

# This multi-agent controller shares parameters between agents
class NMAC(BasicMAC):
    def __init__(self, scheme, groups, args):
        super(NMAC, self).__init__(scheme, groups, args)
        
    def select_actions(self, ep_batch, t_ep, t_env, bs=slice(None), test_mode=False):
        # Only select actions for the selected batch elements in bs
        avail_actions = ep_batch["avail_actions"][:, t_ep]
        qvals = self.forward(ep_batch, t_ep, test_mode=test_mode)
        chosen_actions = self.action_selector.select_action(qvals[bs], avail_actions[bs], t_env, test_mode=test_mode)
        return chosen_actions

    def forward(self, ep_batch, t, test_mode=False):
        agent_inputs = self._build_inputs(ep_batch, t)
        avail_actions = ep_batch["avail_actions"][:, t]
        agent_outs, self.hidden_states = self.agent(agent_inputs, self.hidden_states)

        return agent_outs
