# Supplementary material
Source: ML conference proceedings conference paper supplement (https://proceedings.neurips.cc/paper_files/paper/2022/hash/2456a42386e445ba884511aa17ca4a30-Abstract.html)
Supplement: Supplementary file 1 [file 2456a42386e445ba884511aa17ca4a30-Supplemental-Conference.zip › ResQ/src/envs/__init__.py]

from functools import partial
import sys
import os

from smac.env import MultiAgentEnv, StarCraft2Env
try:
    from .particle import Particle
except:
    pass
from .stag_hunt import StagHunt

def env_fn(env, **kwargs) -> MultiAgentEnv:
    return env(**kwargs)

REGISTRY = {}
REGISTRY["sc2"] = partial(env_fn, env=StarCraft2Env)
try:
    REGISTRY["particle"] = partial(env_fn, env=Particle)
except:
    pass
REGISTRY["stag_hunt"] = partial(env_fn, env=StagHunt)

if sys.platform == "linux":
    os.environ.setdefault("SC2PATH",
                          os.path.join(os.getcwd(), "3rdparty", "StarCraftII"))
