# Supplementary material
Source: ML conference proceedings conference paper supplement (https://proceedings.neurips.cc/paper_files/paper/2022/hash/2456a42386e445ba884511aa17ca4a30-Abstract.html)
Supplement: Supplementary file 1 [file 2456a42386e445ba884511aa17ca4a30-Supplemental-Conference.zip › ResQ/src/envs/particle/scenarios/__init__.py]

import imp
import os.path as osp


def load(name):
    pathname = osp.join(osp.dirname(__file__), name)
    return imp.load_source('', pathname)
