# Supplementary material
Source: ML conference proceedings conference paper supplement (https://proceedings.neurips.cc/paper_files/paper/2022/hash/2456a42386e445ba884511aa17ca4a30-Abstract.html)
Supplement: Supplementary file 1 [file 2456a42386e445ba884511aa17ca4a30-Supplemental-Conference.zip › ResQ/src/envs/particle/scenarios/simple_tag_coop.py]

import numpy as np
from multiagent.core import World, Agent, Landmark
from multiagent.scenario import BaseScenario


class Scenario(BaseScenario):
    def make_world(self, args=None):
        world = World()
        # set any world properties first
        world.dim_c = 2
        num_good_agents = 1
        num_adversaries = 3
        num_agents = num_adversaries + num_good_agents # deactivate "good" agent
        num_landmarks = 2
        # add agents
        world.agents = [Agent() for i in range(num_agents)]
        for i, agent in enumerate(world.agents):
            agent.name = 'agent %d' % i
            agent.collide = True
            agent.silent = True
            agent.adversary = True if i < num_adversaries else False # last agent is good agent
            agent.size = 0.075 if agent.adversary else 0.05
            agent.accel = 3.0 if agent.adversary else 4.0
            agent.max_speed = 1.0 if agent.adversary else 1.3
            agent.action_callback = None if i < (num_agents-1) else self.prey_policy
            agent.view_radius = getattr(args, "agent_view_radius", -1)
            print("AGENT VIEW RADIUS set to: {}".format(agent.view_radius))
        # add landmarks
        world.landmarks = [Landmark() for i in range(num_landmarks)]
        for i, landmark in enumerate(world.landmarks):
            landmark.name = 'landmark %d' % i
            landmark.collide = True
            landmark.movable = False
            landmark.size = 0.2
            landmark.boundary = False
        # make initial conditions
        self.reset_world(world)
        self.score_function= getattr(args, "score_function", "sum")
        return world

    def prey_policy(self, agent, world):
        action = None
        n = 100 # number of positions sampled
        # sample actions randomly from a target circle
        length = np.sqrt(np.random.uniform(0, 1, n))
        angle = np.pi * np.random.uniform(0, 2, n)
        x = length * np.cos(angle)
        y = length * np.sin(angle)

        # evaluate score for each position
        # check whether positions are reachable
        # sample a few evenly spaced points on the way and see if they collide with anything
        scores = np.zeros(n, dtype=np.float32)
        n_iter = 5

        if self.score_function == "sum":
            for i in range(n_iter):
                waypoints_length = (length / float(n_iter)) * (i + 1)
                x_wp = waypoints_length * np.cos(angle)
                y_wp = waypoints_length * np.sin(angle)
                proj_pos = np.vstack((x_wp, y_wp)).transpose() + agent.state.p_pos
                for _agent in world.agents:
                    if _agent.name != agent.name:
                        delta_pos = _agent.state.p_pos - proj_pos
                        dist = np.sqrt(np.sum(np.square(delta_pos), axis=1))
                        dist_min = _agent.size + agent.size
                        scores[dist < dist_min] = -9999999
                        if i == n_iter - 1 and _agent.movable:
                            scores += dist
        elif self.score_function == "min":
            rel_dis = []
            adv_names = []
            adversaries = self.adversaries(world)
            proj_pos = np.vstack((x, y)).transpose() + agent.state.p_pos # the position of the 100 sampled points.
            for adv in adversaries:
                rel_dis.append(np.sqrt(np.sum(np.square(agent.state.p_pos - adv.state.p_pos))))
                adv_names.append(adv.name)
            min_dis_adv_name = adv_names[np.argmin(rel_dis)]
            for adv in adversaries:
                delta_pos = adv.state.p_pos - proj_pos
                dist = np.sqrt(np.sum(np.square(delta_pos), axis=1))
                dist_min = adv.size + agent.size
                scores[dist < dist_min] = -9999999
                if adv.name == min_dis_adv_name:
                    scores += dist
        else:
            raise Exception("Unknown score function {}".format(self.score_function))

        # move to best position
        best_idx = np.argmax(scores)
        chosen_action = np.array([x[best_idx], y[best_idx]], dtype=np.float32)
        if scores[best_idx] < 0:
            chosen_action *= 0.0 # cannot go anywhere
        return chosen_action

    def reset_world(self, world):
        # random properties for agents
        for i, agent in enumerate(world.agents):
            agent.color = np.array([0.35, 0.85, 0.35]) if not agent.adversary else np.array([0.85, 0.35, 0.35])
            # random properties for landmarks
        for i, landmark in enumerate(world.landmarks):
            landmark.color = np.array([0.25, 0.25, 0.25])
        # set random initial states
        for agent in world.agents:
            agent.state.p_pos = np.random.uniform(-1, +1, world.dim_p)
            agent.state.p_vel = np.zeros(world.dim_p)
            agent.state.c = np.zeros(world.dim_c)
        for i, landmark in enumerate(world.landmarks):
            if not landmark.boundary:
                landmark.state.p_pos = np.random.uniform(-0.9, +0.9, world.dim_p)
                landmark.state.p_vel = np.zeros(world.dim_p)


    def benchmark_data(self, agent, world):
        # returns data for benchmarking purposes
        if agent.adversary:
            collisions = 0
            for a in self.good_agents(world):
                if self.is_collision(a, agent):
                    collisions += 1
            return collisions
        else:
            return 0


    def is_collision(self, agent1, agent2):
        delta_pos = agent1.state.p_pos - agent2.state.p_pos
        dist = np.sqrt(np.sum(np.square(delta_pos)))
        dist_min = agent1.size + agent2.size
        return True if dist < dist_min else False

    # return all agents that are not adversaries
    def good_agents(self, world):
        return [agent for agent in world.agents if not agent.adversary]

    # return all adversarial agents
    def adversaries(self, world):
        return [agent for agent in world.agents if agent.adversary]


    def reward(self, agent, world):
        # Agents are rewarded based on minimum agent distance to each landmark
        main_reward = self.adversary_reward(agent, world) if agent.adversary else self.agent_reward(agent, world)
        return main_reward

    def agent_reward(self, agent, world):
        # Agents are negatively rewarded if caught by adversaries
        rew = 0
        shape = False
        adversaries = self.adversaries(world)
        if shape:  # reward can optionally be shaped (increased reward for increased distance from adversary)
            for adv in adversaries:
                rew += 0.1 * np.sqrt(np.sum(np.square(agent.state.p_pos - adv.state.p_pos)))
        if agent.collide:
            for a in adversaries:
                if self.is_collision(a, agent):
                    rew -= 10

        # agents are penalized for exiting the screen, so that they can be caught by the adversaries
        def bound(x):
            if x < 0.9:
                return 0
            if x < 1.0:
                return (x - 0.9) * 10
            return min(np.exp(2 * x - 2), 10)
        for p in range(world.dim_p):
            x = abs(agent.state.p_pos[p])
            rew -= bound(x)

        return rew

    def adversary_reward(self, agent, world):
        # Adversaries are rewarded for collisions with agents
        rew = 0
        shape = False
        agents = self.good_agents(world)
        adversaries = self.adversaries(world)
        if shape:  # reward can optionally be shaped (decreased reward for increased distance from agents)
            for adv in adversaries:
                rew -= 0.1 * min([np.sqrt(np.sum(np.square(a.state.p_pos - adv.state.p_pos))) for a in agents])
        if agent.collide:
            for ag in agents:
                for adv in adversaries:
                    if self.is_collision(ag, adv):
                        rew += 10
        return rew

    def observation(self, agent, world):
        # get positions of all entities in this agent's reference frame
        entity_pos = []
        for entity in world.landmarks:
            dist = np.sqrt(np.sum(np.square(entity.state.p_pos - agent.state.p_pos)))
            if not entity.boundary and (agent.view_radius >= 0) and dist <= agent.view_radius:
                entity_pos.append(entity.state.p_pos - agent.state.p_pos)
            else:
                entity_pos.append(np.array([0., 0.]))
        # communication of all other agents
        comm = []
        other_pos = []
        other_vel = []
        for other in world.agents:
            if other is agent: continue
            dist = np.sqrt(np.sum(np.square(other.state.p_pos - agent.state.p_pos)))
            if agent.view_radius >= 0 and dist <= agent.view_radius:
                comm.append(other.state.c)
                other_pos.append(other.state.p_pos - agent.state.p_pos)
                if not other.adversary:
                    other_vel.append(other.state.p_vel)
            else:
                other_pos.append(np.array([0., 0.]))
                if not other.adversary:
                    other_vel.append(np.array([0., 0.]))
        return np.concatenate([agent.state.p_vel] + [agent.state.p_pos] + entity_pos + other_pos + other_vel)

    def full_observation(self, agent, world):
        # get positions of all entities in this agent's reference frame
        entity_pos = []
        for entity in world.landmarks:
            if not entity.boundary:
                entity_pos.append(entity.state.p_pos - agent.state.p_pos)
        # communication of all other agents
        comm = []
        other_pos = []
        other_vel = []
        for other in world.agents:
            if other is agent: continue
            comm.append(other.state.c)
            other_pos.append(other.state.p_pos - agent.state.p_pos)
            if not other.adversary:
                other_vel.append(other.state.p_vel)
        return np.concatenate([agent.state.p_vel] + [agent.state.p_pos] + entity_pos + other_pos + other_vel)
