# Supplementary material
Source: ML conference proceedings conference paper supplement (https://proceedings.neurips.cc/paper_files/paper/2022/hash/2456a42386e445ba884511aa17ca4a30-Abstract.html)
Supplement: Supplementary file 1 [file 2456a42386e445ba884511aa17ca4a30-Supplemental-Conference.zip › ResQ/src/learners/__init__.py]

from .q_learner import QLearner
from .coma_learner import COMALearner
from .qtran_learner import QLearner as QTranLearner
from .ppo_learner import PPOLearner
from .lica_learner import LICALearner
from .nq_learner import NQLearner
from .policy_gradient_v2 import PGLearner_v2
from .max_q_learner import MAXQLearner
from .dmaq_qatten_learner import DMAQ_qattenLearner
from .offpg_learner import OffPGLearner
from .maven_learner import MAVENLearner
from .fmac_learner import FMACLearner
from .rest_q_learner import RestQLearner
from .rest_q_learner_central import RestQLearnerCentral

REGISTRY = {}

REGISTRY["q_learner"] = QLearner
REGISTRY["coma_learner"] = COMALearner
REGISTRY["qtran_learner"] = QTranLearner
REGISTRY["ppo_learner"] = PPOLearner
REGISTRY["lica_learner"] = LICALearner
REGISTRY["nq_learner"] = NQLearner
REGISTRY["policy_gradient_v2"] = PGLearner_v2
REGISTRY["max_q_learner"] = MAXQLearner
REGISTRY["dmaq_qatten_learner"] = DMAQ_qattenLearner
REGISTRY["offpg_learner"] = OffPGLearner
REGISTRY["maven_learner"] = MAVENLearner
REGISTRY["fmac_learner"] = FMACLearner
REGISTRY["restq_learner"] = RestQLearner
REGISTRY["restq_learner_central"] = RestQLearnerCentral
