# Supplementary material
Source: ML conference proceedings conference paper supplement (https://proceedings.neurips.cc/paper_files/paper/2022/hash/2456a42386e445ba884511aa17ca4a30-Abstract.html)
Supplement: Supplementary file 1 [file 2456a42386e445ba884511aa17ca4a30-Supplemental-Conference.zip › ResQ/src/modules/agents/__init__.py]

REGISTRY = {}

from .rnn_agent import RNNAgent
from .n_rnn_agent import NRNNAgent
from .rnn_ppo_agent import RNNPPOAgent
from .conv_agent import ConvAgent
from .ff_agent import FFAgent
from .central_rnn_agent import CentralRNNAgent
from .mlp_agent import MLPAgent

REGISTRY["rnn"] = RNNAgent
REGISTRY["n_rnn"] = NRNNAgent
REGISTRY["rnn_ppo"] = RNNPPOAgent
REGISTRY["conv_agent"] = ConvAgent
REGISTRY["ff"] = FFAgent
REGISTRY["central_rnn"] = CentralRNNAgent
REGISTRY["mlp"] = MLPAgent
