# Supplementary material
Source: ML conference proceedings conference paper supplement (https://proceedings.neurips.cc/paper_files/paper/2022/hash/2456a42386e445ba884511aa17ca4a30-Abstract.html)
Supplement: Supplementary file 1 [file 2456a42386e445ba884511aa17ca4a30-Supplemental-Conference.zip › ResQ/src/modules/agents/conv_agent.py]

import torch.nn as nn
import torch.nn.functional as F


class ConvAgent(nn.Module):
    def __init__(self, input_shape, args):
        super(ConvAgent, self).__init__()
        self.args = args

        self.conv1 = nn.Conv1d(input_shape, 64, 2)
        self.conv2 = nn.Conv1d(64, 128, 3)
        self.fc1 = nn.Linear(128, 256)
        self.fc2 = nn.Linear(256, args.n_actions)

    def init_hidden(self):
        return None

    def forward(self, inputs, hidden_state=None):
        b, t, a, c = inputs.size()
        inputs = inputs.permute(0, 2, 3, 1).reshape(-1, c, t)
        
        x = F.relu(self.conv1(inputs), inplace=True)
        x = F.relu(self.conv2(x), inplace=True)
        x = x.view(b, a, 128)
        x = F.relu(self.fc1(x), inplace=True)
        q = self.fc2(x)
        
        return q.view(b, a, -1), None
