# Supplementary material
Source: ML conference proceedings conference paper supplement (https://proceedings.neurips.cc/paper_files/paper/2022/hash/2456a42386e445ba884511aa17ca4a30-Abstract.html)
Supplement: Supplementary file 1 [file 2456a42386e445ba884511aa17ca4a30-Supplemental-Conference.zip › ResQ/src/modules/agents/mlp_agent.py]

import torch.nn as nn
import torch.nn.functional as F


class MLPAgent(nn.Module):
    def __init__(self, input_shape, args):
        super(MLPAgent, self).__init__()
        self.args = args

        self.fc1 = nn.Linear(input_shape, args.rnn_hidden_dim)
        self.fc2 = nn.Linear(args.rnn_hidden_dim, args.rnn_hidden_dim)
        self.fc3 = nn.Linear(args.rnn_hidden_dim, args.n_actions)

        self.agent_return_logits = getattr(self.args, "agent_return_logits", False)

    def init_hidden(self):
        return None

    def forward(self, inputs, h=None):
        x = F.relu(self.fc1(inputs))
        x = F.relu(self.fc2(x))
        if self.agent_return_logits:
            actions = self.fc3(x)
        else:
            actions = F.tanh(self.fc3(x))
        return actions
