# Supplementary material
Source: ML conference proceedings conference paper supplement (https://proceedings.neurips.cc/paper_files/paper/2022/hash/2456a42386e445ba884511aa17ca4a30-Abstract.html)
Supplement: Supplementary file 1 [file 2456a42386e445ba884511aa17ca4a30-Supplemental-Conference.zip › ResQ/src/modules/agents/n_rnn_agent.py]

import torch.nn as nn
import torch.nn.functional as F
import torch as th
import numpy as np
import torch.nn.init as init

class NRNNAgent(nn.Module):
    def __init__(self, input_shape, args):
        super(NRNNAgent, self).__init__()
        self.args = args

        self.fc1 = nn.Linear(input_shape, args.rnn_hidden_dim)
        self.rnn = nn.GRUCell(args.rnn_hidden_dim, args.rnn_hidden_dim)
        self.fc2 = nn.Linear(args.rnn_hidden_dim, args.n_actions)
        
        # self.apply(weights_init)

    def init_hidden(self):
        # make hidden states on same device as model
        return self.fc1.weight.new(1, self.args.rnn_hidden_dim).zero_()

    def forward(self, inputs, hidden_state):
        b, a, e = inputs.size()
        
        x = F.relu(self.fc1(inputs.view(-1, e)), inplace=True)
        h_in = hidden_state.reshape(-1, self.args.rnn_hidden_dim)
        h = self.rnn(x, h_in)
        q = self.fc2(h)

        return q.view(b, a, -1), h.view(b, a, -1)
