# Supplementary material
Source: ML conference proceedings conference paper supplement (https://proceedings.neurips.cc/paper_files/paper/2022/hash/2456a42386e445ba884511aa17ca4a30-Abstract.html)
Supplement: Supplementary file 1 [file 2456a42386e445ba884511aa17ca4a30-Supplemental-Conference.zip › ResQ/src/modules/agents/rnn_ppo_agent.py]

import torch.nn as nn
import torch.nn.functional as F

class RNNPPOAgent(nn.Module):
    def __init__(self, input_shape, args):
        super(RNNPPOAgent, self).__init__()
        self.args = args

        self.fc1 = nn.Linear(input_shape, args.rnn_hidden_dim)
        self.rnn = nn.GRUCell(args.rnn_hidden_dim, args.rnn_hidden_dim)
        self.fc2 = nn.Linear(args.rnn_hidden_dim, args.n_actions)
        self.fc3 = nn.Linear(args.rnn_hidden_dim, 1)

    def init_hidden(self):
        # make hidden states on same device as model
        return self.fc1.weight.new(1, self.args.rnn_hidden_dim).zero_()

    def forward(self, inputs, hidden_state):
        x = F.relu(self.fc1(inputs))
        h_in = hidden_state.reshape(-1, self.args.rnn_hidden_dim)
        h = self.rnn(x, h_in)
        pi = self.fc2(h)
        q = self.fc3(h)
        return pi, q, h
