# Supplementary material
Source: ML conference proceedings conference paper supplement (https://proceedings.neurips.cc/paper_files/paper/2022/hash/2456a42386e445ba884511aa17ca4a30-Abstract.html)
Supplement: Supplementary file 1 [file 2456a42386e445ba884511aa17ca4a30-Supplemental-Conference.zip › ResQ/src/modules/critics/offpg.py]

import torch as th
import torch.nn as nn
import torch.nn.functional as F


class OffPGCritic(nn.Module):
    def __init__(self, scheme, args):
        super(OffPGCritic, self).__init__()

        self.args = args
        self.n_actions = args.n_actions
        self.n_agents = args.n_agents

        input_shape = self._get_input_shape(scheme)
        self.output_type = "q"

        # Set up network layers
        self.fc1 = nn.Linear(input_shape, 256)
        self.fc2 = nn.Linear(256, 256)
        self.fc_v = nn.Linear(256, 1)
        self.fc3 = nn.Linear(256, self.n_actions)

    def forward(self, inputs):
        x = F.relu(self.fc1(inputs))
        x = F.relu(self.fc2(x))
        v = self.fc_v(x)
        a = self.fc3(x)
        q = a + v
        return q

    def _build_inputs(self, batch, bs, max_t):
        inputs = []
        # state, obs, action
        inputs.append(batch["state"][:].unsqueeze(2).repeat(1, 1, self.n_agents, 1))
        inputs.append(batch["obs"][:])
        #actions = batch["actions_onehot"][:].view(bs, max_t, 1, -1).repeat(1, 1, self.n_agents, 1)
        #agent_mask = (1 - th.eye(self.n_agents, device=batch.device))
        #agent_mask = agent_mask.view(-1, 1).repeat(1, self.n_actions).view(self.n_agents, -1)
        #inputs.append(actions * agent_mask.unsqueeze(0).unsqueeze(0))
        # last actions
        #if self.args.obs_last_action:
        #    last_action = []
        #    last_action.append(actions[:, 0:1].squeeze(2))
        #    last_action.append(actions[:, :-1].squeeze(2))
        #    last_action = th.cat([x for x in last_action], dim = 1)
        #    inputs.append(last_action)
        #agent id
        inputs.append(th.eye(self.n_agents, device=batch.device).unsqueeze(0).unsqueeze(0).expand(bs, max_t, -1, -1))
        inputs = th.cat([x.reshape(bs, max_t, self.n_agents, -1) for x in inputs], dim=-1)
        return inputs


    def _get_input_shape(self, scheme):
        # state
        input_shape = scheme["state"]["vshape"]
        # observation
        input_shape += scheme["obs"]["vshape"]
        # actions and last actions
        #input_shape += scheme["actions_onehot"]["vshape"][0] * self.n_agents
        #if self.args.obs_last_action:
        #    input_shape += scheme["actions_onehot"]["vshape"][0] * self.n_agents
        # agent id
        input_shape += self.n_agents
        return input_shape
