# Supplementary material
Source: ML conference proceedings conference paper supplement (https://proceedings.neurips.cc/paper_files/paper/2022/hash/2456a42386e445ba884511aa17ca4a30-Abstract.html)
Supplement: Supplementary file 1 [file 2456a42386e445ba884511aa17ca4a30-Supplemental-Conference.zip › ResQ/src/modules/mixers/nmix.py]

import torch as th
import torch.nn as nn
import torch.nn.functional as F
import numpy as np

class Mixer(nn.Module):
    def __init__(self, args, abs=True):
        super(Mixer, self).__init__()

        self.args = args
        self.abs = abs
        self.n_agents = args.n_agents
        self.embed_dim = args.mixing_embed_dim
        self.input_dim = self.state_dim = int(np.prod(args.state_shape)) 
        
        # hyper w1 b1
        self.hyper_w1 = nn.Sequential(nn.Linear(self.input_dim, args.hypernet_embed),
                                        nn.ReLU(inplace=True),
                                        nn.Linear(args.hypernet_embed, self.n_agents * self.embed_dim))
        self.hyper_b1 = nn.Sequential(nn.Linear(self.input_dim, self.embed_dim))
        
        # hyper w2 b2
        self.hyper_w2 = nn.Sequential(nn.Linear(self.input_dim, args.hypernet_embed),
                                        nn.ReLU(inplace=True),
                                        nn.Linear(args.hypernet_embed, self.embed_dim))
        self.hyper_b2 = nn.Sequential(nn.Linear(self.input_dim, self.embed_dim),
                            nn.ReLU(inplace=True),
                            nn.Linear(self.embed_dim, 1))

    def forward(self, qvals, states):
        # reshape
        b, t, _ = qvals.size()
        
        qvals = qvals.reshape(b * t, 1, self.n_agents)
        states = states.reshape(-1, self.state_dim)

        # First layer
        w1 = self.hyper_w1(states).view(-1, self.n_agents, self.embed_dim) # b * t, n_agents, emb
        b1 = self.hyper_b1(states).view(-1, 1, self.embed_dim)
        
        # Second layer
        w2 = self.hyper_w2(states).view(-1, self.embed_dim, 1) # b * t, emb, 1
        b2= self.hyper_b2(states).view(-1, 1, 1)
        
        if self.abs:
            w1 = w1.abs()
            w2 = w2.abs()
            
        # Forward
        hidden = F.elu(th.matmul(qvals, w1) + b1) # b * t, 1, emb
        y = th.matmul(hidden, w2) + b2 # b * t, 1, 1
        
        return y.view(b, t, -1)
    
