# Supplementary material
Source: ML conference proceedings conference paper supplement (https://proceedings.neurips.cc/paper_files/paper/2022/hash/2456a42386e445ba884511aa17ca4a30-Abstract.html)
Supplement: Supplementary file 1 [file 2456a42386e445ba884511aa17ca4a30-Supplemental-Conference.zip › ResQ/src/modules/mixers/vdn.py]

import torch as th
import torch.nn as nn


class VDNMixer(nn.Module):
    def __init__(self):
        super(VDNMixer, self).__init__()

    def forward(self, agent_qs, batch):
        retval =  th.sum(agent_qs, dim=2, keepdim=True)
        if len(retval.shape) == 4:
            retval=retval.squeeze(3)
        return retval
