# Supplementary material
Source: ML conference proceedings conference paper supplement (https://proceedings.neurips.cc/paper_files/paper/2022/hash/2456a42386e445ba884511aa17ca4a30-Abstract.html)
Supplement: Supplementary file 1 [file 2456a42386e445ba884511aa17ca4a30-Supplemental-Conference.zip › ResQ/src/run/__init__.py]

from .run import run as default_run
from .on_off_run import run as on_off_run
from .dop_run import run as dop_run

REGISTRY = {}
REGISTRY["default"] = default_run
REGISTRY["on_off"] = on_off_run
REGISTRY["dop_run"] = dop_run
