# Supplementary material
Source: ML conference proceedings conference paper supplement (https://proceedings.neurips.cc/paper_files/paper/2022/hash/2456a42386e445ba884511aa17ca4a30-Abstract.html)
Supplement: Supplementary file 1 [file 2456a42386e445ba884511aa17ca4a30-Supplemental-Conference.zip › ResQ/src/smac/env/multiagentenv.py]

from __future__ import absolute_import
from __future__ import division
from __future__ import print_function


class MultiAgentEnv(object):

    def step(self, actions):
        """Returns reward, terminated, info."""
        raise NotImplementedError

    def get_obs(self):
        """Returns all agent observations in a list."""
        raise NotImplementedError

    def get_obs_agent(self, agent_id):
        """Returns observation for agent_id."""
        raise NotImplementedError

    def get_obs_size(self):
        """Returns the size of the observation."""
        raise NotImplementedError

    def get_state(self):
        """Returns the global state."""
        raise NotImplementedError

    def get_state_size(self):
        """Returns the size of the global state."""
        raise NotImplementedError

    def get_avail_actions(self):
        """Returns the available actions of all agents in a list."""
        raise NotImplementedError

    def get_avail_agent_actions(self, agent_id):
        """Returns the available actions for agent_id."""
        raise NotImplementedError

    def get_total_actions(self):
        """Returns the total number of actions an agent could ever take."""
        raise NotImplementedError

    def reset(self):
        """Returns initial observations and states."""
        raise NotImplementedError

    def render(self):
        raise NotImplementedError

    def close(self):
        raise NotImplementedError

    def seed(self):
        raise NotImplementedError

    def save_replay(self):
        """Save a replay."""
        raise NotImplementedError

    def get_env_info(self):
        env_info = {"state_shape": self.get_state_size(),
                    "obs_shape": self.get_obs_size(),
                    "n_actions": self.get_total_actions(),
                    "n_agents": self.n_agents,
                    "episode_limit": self.episode_limit,
                    "n_enemies": self.n_enemies,
                    "unit_type_bits": self.unit_type_bits,
                    "shield_bits_ally": self.shield_bits_ally,
                    "shield_bits_enemy": self.shield_bits_enemy}
        return env_info
