# Supplementary material
Source: ML conference proceedings conference paper supplement (https://proceedings.neurips.cc/paper_files/paper/2022/hash/2456a42386e445ba884511aa17ca4a30-Abstract.html)
Supplement: Supplementary file 1 [file 2456a42386e445ba884511aa17ca4a30-Supplemental-Conference.zip › ResQ/src/smac/env/starcraft2/__init__.py]

from __future__ import absolute_import
from __future__ import division
from __future__ import print_function

from absl import flags
FLAGS = flags.FLAGS
FLAGS(['main.py'])
