# Supplementary material
Source: ML conference proceedings conference paper supplement (https://proceedings.neurips.cc/paper_files/paper/2022/hash/2456a42386e445ba884511aa17ca4a30-Abstract.html)
Supplement: Supplementary file 1 [file 2456a42386e445ba884511aa17ca4a30-Supplemental-Conference.zip › ResQ/src/smac/env/starcraft2/maps/__init__.py]

from __future__ import absolute_import
from __future__ import division
from __future__ import print_function

from smac.env.starcraft2.maps import smac_maps


def get_map_params(map_name):
    map_param_registry = smac_maps.get_smac_map_registry()
    return map_param_registry[map_name]
