# Supplementary material
Source: ML conference proceedings conference paper supplement (https://proceedings.neurips.cc/paper_files/paper/2022/hash/2456a42386e445ba884511aa17ca4a30-Abstract.html)
Supplement: Supplementary file 1 [file 2456a42386e445ba884511aa17ca4a30-Supplemental-Conference.zip › ResQ/src/smac/examples/rllib/__init__.py]

from smac.examples.rllib.env import RLlibStarCraft2Env
from smac.examples.rllib.model import MaskedActionsModel

__all__ = ["RLlibStarCraft2Env", "MaskedActionsModel"]
