# Supplementary material
Source: ML conference proceedings conference paper supplement (https://proceedings.neurips.cc/paper_files/paper/2022/hash/2456a42386e445ba884511aa17ca4a30-Abstract.html)
Supplement: Supplementary file 1 [file 2456a42386e445ba884511aa17ca4a30-Supplemental-Conference.zip › ResQ/src/smac/examples/rllib/run_qmix.py]

from __future__ import absolute_import
from __future__ import division
from __future__ import print_function

"""Example of running StarCraft2 with RLlib QMIX.

This assumes all agents are homogeneous. The agents are grouped and assigned
to the multi-agent QMIX policy. Note that the default hyperparameters for
RLlib QMIX are different from pymarl's QMIX.
"""

import argparse
from gym.spaces import Tuple

import ray
from ray.tune import run_experiments, register_env

from smac.examples.rllib.env import RLlibStarCraft2Env


if __name__ == "__main__":
    parser = argparse.ArgumentParser()
    parser.add_argument("--num-iters", type=int, default=100)
    parser.add_argument("--num-workers", type=int, default=2)
    parser.add_argument("--map-name", type=str, default="8m")
    args = parser.parse_args()

    def env_creator(smac_args):
        env = RLlibStarCraft2Env(**smac_args)
        agent_list = list(range(env._env.n_agents))
        grouping = {
            "group_1": agent_list,
        }
        obs_space = Tuple([env.observation_space for i in agent_list])
        act_space = Tuple([env.action_space for i in agent_list])
        return env.with_agent_groups(
            grouping, obs_space=obs_space, act_space=act_space)

    ray.init()
    register_env("sc2_grouped", env_creator)

    run_experiments({
        "qmix_sc2": {
            "run": "QMIX",
            "env": "sc2_grouped",
            "stop": {
                "training_iteration": args.num_iters,
            },
            "config": {
                "num_workers": args.num_workers,
                "env_config": {
                    "map_name": args.map_name,
                },
            },
        },
    })
