# Supplementary material
Source: ML conference proceedings conference paper supplement (https://proceedings.neurips.cc/paper_files/paper/2022/hash/2456a42386e445ba884511aa17ca4a30-Abstract.html)
Supplement: Supplementary file 1 [file 2456a42386e445ba884511aa17ca4a30-Supplemental-Conference.zip › ResZ/ResZ-src/controllers/__init__.py]

REGISTRY = {}

from .basic_controller import BasicMAC
from .basic_central_controller import CentralBasicMAC
from .base_controller import BaseCentralMAC

REGISTRY["basic_mac"] = BasicMAC
REGISTRY["basic_central_mac"] = CentralBasicMAC
REGISTRY['base_central_mac'] = BaseCentralMAC
