# Supplementary material
Source: ML conference proceedings conference paper supplement (https://proceedings.neurips.cc/paper_files/paper/2022/hash/2456a42386e445ba884511aa17ca4a30-Abstract.html)
Supplement: Supplementary file 1 [file 2456a42386e445ba884511aa17ca4a30-Supplemental-Conference.zip › ResZ/ResZ-src/learners/__init__.py]

from .q_learner import QLearner
# from .coma_learner import COMALearner
# from .qtran_learner import QLearner as QTranLearner
# from .resq import RestQLearner
from .dresq import DResQ

REGISTRY = {}

REGISTRY["q_learner"] = QLearner
# REGISTRY["coma_learner"] = COMALearner
# REGISTRY["qtran_learner"] = QTranLearner
# REGISTRY["resq"] = RestQLearner
REGISTRY['dresq'] = DResQ
