# Supplementary material
Source: ML conference proceedings conference paper supplement (https://proceedings.neurips.cc/paper_files/paper/2022/hash/2456a42386e445ba884511aa17ca4a30-Abstract.html)
Supplement: Supplementary file 1 [file 2456a42386e445ba884511aa17ca4a30-Supplemental-Conference.zip › ResZ/ResZ-src/modules/agents/__init__.py]

REGISTRY = {}

from .rnn_agent import RNNAgent
from .iqn_rnn_agent import IQNRNNAgent
from .central_rnn_agent import CentralRNNAgent

REGISTRY["rnn"] = RNNAgent
REGISTRY["iqn_rnn"] = IQNRNNAgent
REGISTRY["central_rnn"] = CentralRNNAgent
