# Supplementary material
Source: ML conference proceedings conference paper supplement (https://proceedings.neurips.cc/paper_files/paper/2022/hash/2456a42386e445ba884511aa17ca4a30-Abstract.html)
Supplement: Supplementary file 1 [file 2456a42386e445ba884511aa17ca4a30-Supplemental-Conference.zip › ResZ/ResZ-src/utils/rl_utils.py]

import torch as th
import numpy as np


def build_td_lambda_targets(rewards, terminated, mask, target_qs, n_agents, gamma, td_lambda):
    # Assumes  <target_qs > in B*T*A and <reward >, <terminated >, <mask > in (at least) B*T-1*1
    # Initialise  last  lambda -return  for  not  terminated  episodes
    ret = target_qs.new_zeros(*target_qs.shape)
    ret[:, -1] = target_qs[:, -1] * (1 - th.sum(terminated, dim=1))
    # Backwards  recursive  update  of the "forward  view"
    for t in range(ret.shape[1] - 2, -1, -1):
        ret[:, t] = td_lambda * gamma * ret[:, t + 1] + mask[:, t] * (rewards[:, t] + (1 - td_lambda) * gamma * target_qs[:, t + 1] * (1 - terminated[:, t]))
    # Returns lambda-return from t=0 to t=T-1, i.e. in B*T-1*A
    return ret[:, 0:-1]

def build_distributional_td_lambda_targets(rewards, terminated, mask, target_qs, n_agents, gamma, td_lambda):
    # Assumes  <target_qs > in B*T*A and <reward >, <terminated >, <mask > in (at least) B*T-1*1
    # Initialise  last  lambda -return  for  not  terminated  episodes
    ret = target_qs.new_zeros(*target_qs.shape)
    ret[:, -1] = target_qs[:, -1] * (1 - th.sum(terminated, dim=1).unsqueeze(2))  #.expand_as(target_qs[:, -1]))
    # Backwards  recursive  update  of the "forward  view"
    for t in range(ret.shape[1] - 2, -1, -1):
        ret[:, t] = td_lambda * gamma * ret[:, t + 1] + mask[:, t].unsqueeze(2) * (rewards[:, t].unsqueeze(2) + (1 - td_lambda) * gamma * target_qs[:, t + 1] * (1 - terminated[:, t]).unsqueeze(2))
    # Returns lambda-return from t=0 to t=T-1, i.e. in B*T-1*A
    return ret[:, 0:-1]


def build_gae_targets(rewards, masks, values, gamma, lambd):
    B, T, _ = values.size()
    T -= 1
    advantages = th.zeros(B, T, 1).to(device=values.device)
    advantage_t = th.zeros(B, 1).to(device=values.device)

    for t in reversed(range(T)):
        delta = rewards[:, t] + values[:, t + 1] * gamma * masks[:, t] - values[:, t]
        advantage_t = delta + advantage_t * gamma * lambd * masks[:, t]
        advantages[:, t] = advantage_t

    returns = values[:, :T] + advantages
    return advantages, returns


def build_q_lambda_targets(rewards, terminated, mask, exp_qvals, qvals, gamma, td_lambda):
    # Assumes  <target_qs > in B*T*A and <reward >, <terminated >, <mask > in (at least) B*T-1*1
    # Initialise  last  lambda -return  for  not  terminated  episodes
    ret = exp_qvals.new_zeros(*exp_qvals.shape)
    ret[:, -1] = exp_qvals[:, -1] * (1 - th.sum(terminated, dim=1))
    # Backwards  recursive  update  of the "forward  view"
    for t in range(ret.shape[1] - 2, -1, -1):
        reward = rewards[:, t] + exp_qvals[:, t] - qvals[:, t]  #off-policy correction
        ret[:, t] = td_lambda * gamma * ret[:, t + 1] + mask[:, t] * (reward + (1 - td_lambda) * gamma * exp_qvals[:, t + 1] * (1 - terminated[:, t]))
    # Returns lambda-return from t=0 to t=T-1, i.e. in B*T-1*A
    return ret[:, 0:-1]


def build_target_q(td_q, target_q, mac, mask, gamma, td_lambda, n):
    aug = th.zeros_like(td_q[:, :1])

    #Tree diagram
    mac = mac[:, :-1]
    tree_q_vals = th.zeros_like(td_q)
    coeff = 1.0
    t1 = td_q[:]
    for _ in range(n):
        tree_q_vals += t1 * coeff
        t1 = th.cat(((t1 * mac)[:, 1:], aug), dim=1)
        coeff *= gamma * td_lambda
    return target_q + tree_q_vals


class RunningMeanStd(object):
    # https://en.wikipedia.org/wiki/Algorithms_for_calculating_variance#Parallel_algorithm
    def __init__(self, epsilon=1e-4, shape=()):
        self.mean = np.zeros(shape, 'float64')
        self.var = np.ones(shape, 'float64')
        self.count = epsilon

    def update(self, x):
        batch_mean = np.mean(x, axis=0)
        batch_var = np.var(x, axis=0)
        batch_count = x.shape[0]
        self.update_from_moments(batch_mean, batch_var, batch_count)

    def update_from_moments(self, batch_mean, batch_var, batch_count):
        delta = batch_mean - self.mean
        tot_count = self.count + batch_count

        new_mean = self.mean + delta * batch_count / tot_count
        m_a = self.var * (self.count)
        m_b = batch_var * (batch_count)
        M2 = m_a + m_b + np.square(delta) * self.count * batch_count / (self.count + batch_count)
        new_var = M2 / (self.count + batch_count)

        new_count = batch_count + self.count

        self.mean = new_mean
        self.var = new_var
        self.count = new_count
